# Supplementary material
Source: Springer Nature journal article supplement (https://www.springermedizin.de/resource/supplementary/12885_2009_2167_MOESM2_ESM.pdf/9460680)

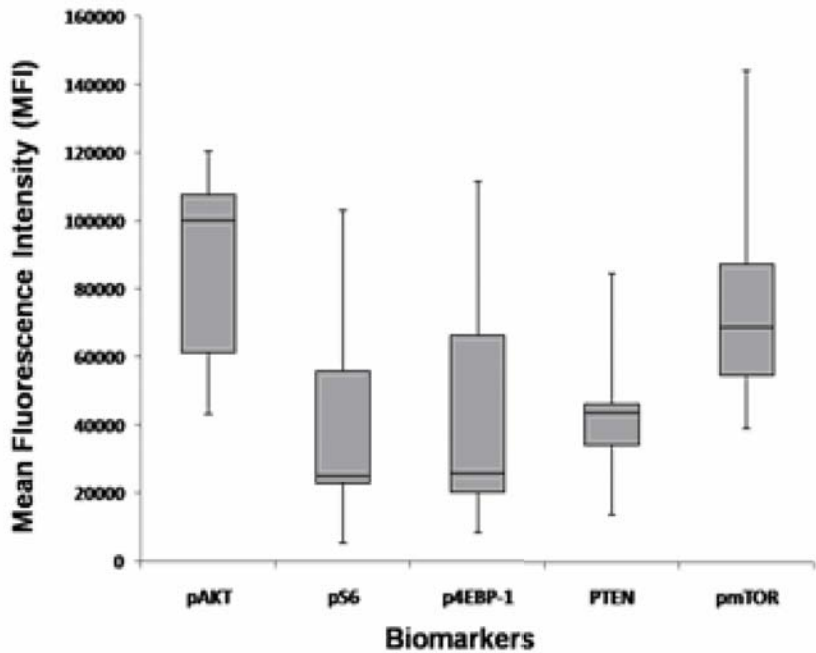

Supplement: MOESM2 [file 9460680]
